# Supplementary material for: Characterising Mitochondrial Capture in an Iberian Shrew
Source: MDPI journal article supplement (doi:10.3390/genes13122228), 2022-11-27
Supplement: s1 [file s1]

**Table S1.** Details of the loci, primers, and annealing temperatures used in this study.

| Locus        | Size (bp) | Forward primer                      | Reverse primer                      | Reference  | T <sub>m</sub> (°C) |
|--------------|-----------|-------------------------------------|-------------------------------------|------------|---------------------|
| <i>CytB</i>  | 1003      | L14723<br>ACCAATGACATGAAAAATCATCGTT | H15915-S<br>TCTCCATTTCTGGTTTACAAGAC | [42]       | 55                  |
|              |           | L14727-SP<br>GACAGGAAAAATCATCGTTG   | H15915-SP<br>TTCATTACTGGTTTACAAGAC  | [43]       | 55                  |
| <i>DBY7</i>  | 504       | DBY7 F<br>GGTCCAGGAGARGCTTTGAA      | DBY7 R<br>CAGCCAATTCTCTTGTTGGG      | [44]       | TD 65-55            |
| <i>ApoB</i>  | 499       | APOB-F<br>GCAATCATTTGACTTAAGTG      | APOB-R<br>GAGCAACAATATCTGATTGG      | [45]       | 60                  |
| <i>BRCA1</i> | 774       | B1F<br>TGAGAACAGCACTTTATTACTCAC     | B1R<br>ATTCTAGTTCCATATTGCTTATACTG   | [46]       | 60                  |
| <i>ZFX1</i>  | 190       | ZFX1SA-F<br>GGTTAAAAGATGGGGCTGGAGA  | ZFX1SA-R<br>GCATGAGCGGTCAAGTTCTGTT  | This study | 64                  |

bp: base pairs; T<sub>m</sub>: primer melting temperature; TD: touchdown PCR

**Table S2.** All *Sorex* from Portugal, Spain, France, and Andorra that were genetically typed in this study for various combinations of the mitochondrial locus *CytB* and nuclear loci *ApoB*, *BRCA1*, *DBY7*, and *ZFX1*. They were classified as *S. araneus*, *S. coronatus*, or *S. granarius* based on geography [14] or genotype at nuclear or mitochondrial DNA loci (see text).

| Code                 | Geographical species       | nuDNA species    | mtDNA species    | Locality                 | Country  | <i>CytB</i> | <i>ApoB</i> | <i>BRCA1</i> | <i>DBY7</i> | <i>ZFX1</i> |
|----------------------|----------------------------|------------------|------------------|--------------------------|----------|-------------|-------------|--------------|-------------|-------------|
| SM.AS.0323           | <i>coronatus</i>           | <i>coronatus</i> | <i>coronatus</i> | Picos de Europa          | Spain    | X           | X           | X            |             | X           |
| SM.CA.0340           | <i>coronatus</i>           | <i>coronatus</i> | <i>coronatus</i> | Cantabria                | Spain    | X           | X           | X            | X           | X           |
| SM.AS.0448           | <i>coronatus/granarius</i> | -                | <i>granarius</i> | Illano                   | Spain    | X           |             |              |             |             |
| SM.AS.0449           | <i>coronatus/granarius</i> | <i>coronatus</i> | -                | Illano                   | Spain    |             |             |              | X           | X           |
| SM.AS.0451           | <i>coronatus/granarius</i> | -                | <i>granarius</i> | Illano                   | Spain    | X           |             |              |             |             |
| SM.AS.0452           | <i>coronatus/granarius</i> | <i>coronatus</i> | -                | Illano                   | Spain    |             | X           |              |             | X           |
| SM.AS.1180           | <i>coronatus</i>           | <i>coronatus</i> | <i>coronatus</i> | Picos de Europa          | Spain    | X           | X           | X            | X           | X           |
| SM.AS.1181           | <i>coronatus</i>           | <i>coronatus</i> | <i>coronatus</i> | Picos de Europa          | Spain    | X           | X           | X            | X           | X           |
| SM.AS.1182           | <i>coronatus</i>           | <i>coronatus</i> | <i>coronatus</i> | Picos de Europa          | Spain    | X           | X           | X            | X           | X           |
| SM.AS.1183           | <i>coronatus</i>           | <i>coronatus</i> | -                | Picos de Europa          | Spain    |             | X           | X            | X           | X           |
| SM.AS.1185           | <i>coronatus</i>           | <i>coronatus</i> | <i>coronatus</i> | Picos de Europa          | Spain    | X           |             |              |             | X           |
| SM.CA.1187           | <i>coronatus</i>           | <i>coronatus</i> | <i>coronatus</i> | Cantabria                | Spain    | X           | X           | X            | X           | X           |
| SM.CA.1188           | <i>coronatus</i>           | <i>coronatus</i> | <i>coronatus</i> | Cantabria                | Spain    | X           | X           | X            | X           | X           |
| SM.CA.1189           | <i>coronatus</i>           | <i>coronatus</i> | <i>coronatus</i> | Cantabria                | Spain    | X           | X           |              | X           | X           |
| SM.PB.1190           | <i>coronatus</i>           | <i>coronatus</i> | <i>coronatus</i> | Bizcaia                  | Spain    | X           | X           | X            |             | X           |
| SM.PB.1191           | <i>coronatus</i>           | <i>coronatus</i> | <i>coronatus</i> | Bizcaia                  | Spain    | X           | X           | X            | X           | X           |
| SM.PB.1192           | <i>coronatus</i>           | <i>coronatus</i> | <i>coronatus</i> | Bizcaia                  | Spain    | X           | X           | X            |             |             |
| SM.BU.1193           | <i>coronatus</i>           | <i>coronatus</i> | -                | Burgos                   | Spain    |             | X           | X            | X           | X           |
| SM.BU.1194           | <i>coronatus</i>           | <i>coronatus</i> | -                | Burgos                   | Spain    |             | X           | X            | X           | X           |
| SM.BU.1195           | <i>coronatus</i>           | <i>coronatus</i> | <i>coronatus</i> | Burgos                   | Spain    | X           | X           | X            |             | X           |
| SM.BU.1196           | <i>coronatus</i>           | <i>coronatus</i> | <i>coronatus</i> | Burgos                   | Spain    | X           | X           | X            |             | X           |
| SM.BU.1197           | <i>coronatus</i>           | <i>coronatus</i> | <i>coronatus</i> | Burgos                   | Spain    | X           | X           | X            | X           | X           |
| SM.1344              | <i>granarius</i>           | -                | <i>granarius</i> | Bertiandos               | Portugal | X           |             |              |             |             |
| SM.1990              | <i>granarius</i>           | <i>granarius</i> | <i>granarius</i> | Parque Nac. Peneda Geres | Portugal | X           | X           | X            | X           | X           |
| SM.2175              | <i>coronatus</i>           | <i>coronatus</i> | <i>coronatus</i> | Picos de Europa          | Spain    | X           | X           | X            |             | X           |
| SM.2176              | <i>coronatus</i>           | <i>coronatus</i> | <i>coronatus</i> | Burgos                   | Spain    | X           | X           | X            |             | X           |
| SM.2178 <sup>1</sup> | <i>araneus/coronatus</i>   | <i>araneus</i>   | <i>araneus</i>   | Pyrenees                 | Spain    | X           | X           | X            |             | X           |
| SM.2179 <sup>2</sup> | <i>araneus/coronatus</i>   | <i>araneus</i>   | <i>araneus</i>   | Pyrenees                 | Spain    | X           | X           |              | X           | X           |

|                      |                          |                  |                  |                     |          |   |   |   |   |   |
|----------------------|--------------------------|------------------|------------------|---------------------|----------|---|---|---|---|---|
| SM.2182 <sup>3</sup> | <i>araneus/coronatus</i> | <i>araneus</i>   | -                | Vall d'Aran         | Spain    |   | X |   |   |   |
| SM.2183 <sup>4</sup> | <i>araneus/coronatus</i> | <i>coronatus</i> | <i>coronatus</i> | Eugui               | Spain    | X | X |   | X |   |
| SM.2184 <sup>5</sup> | <i>araneus/coronatus</i> | <i>araneus</i>   | <i>araneus</i>   | Tarter Pas Casa     | Andorra  | X | X |   |   | X |
| SM.2196              | <i>coronatus</i>         | -                | <i>coronatus</i> | Baie de l'Aiguillon | France   | X |   |   |   |   |
| SM.2199              | <i>coronatus</i>         | <i>coronatus</i> | <i>coronatus</i> | Abbeville           | France   | X | X | X | X | X |
| SM.2200              | <i>coronatus</i>         | <i>coronatus</i> | -                | Abbeville           | France   |   |   | X | X | X |
| SM.2201              | <i>coronatus</i>         | <i>coronatus</i> | <i>coronatus</i> | Calais              | France   | X | X | X | X | X |
| SM.2202              | <i>coronatus</i>         | <i>coronatus</i> | <i>coronatus</i> | Calais              | France   | X | X | X | X | X |
| SM.2203              | <i>coronatus</i>         | <i>coronatus</i> | <i>coronatus</i> | Calais              | France   | X | X | X |   | X |
| SM.2204              | <i>coronatus</i>         | <i>coronatus</i> | <i>coronatus</i> | Broualan            | France   | X | X | X | X | X |
| SM.2206              | <i>coronatus</i>         | <i>coronatus</i> | <i>coronatus</i> | Mas d'Artige        | France   | X | X | X | X |   |
| SM.2207              | <i>coronatus</i>         | <i>coronatus</i> | <i>coronatus</i> | St Setiers          | France   | X | X | X | X | X |
| SM.2208              | <i>coronatus</i>         | <i>coronatus</i> | <i>coronatus</i> | St Setiers          | France   | X | X | X | X | X |
| SM.2209              | <i>coronatus</i>         | <i>coronatus</i> | <i>coronatus</i> | St Setiers          | France   | X | X | X | X | X |
| SM.2210              | <i>coronatus</i>         | <i>coronatus</i> | <i>coronatus</i> | St Setiers          | France   | X | X | X | X | X |
| SM.2211              | <i>coronatus</i>         | <i>coronatus</i> | <i>coronatus</i> | Troarn              | France   | X | X | X |   | X |
| SM.2212              | <i>coronatus</i>         | <i>coronatus</i> | <i>coronatus</i> | Broualan            | France   | X | X | X | X | X |
| SM.2213              | <i>coronatus</i>         | <i>coronatus</i> | <i>coronatus</i> | Broualan            | France   | X | X |   | X |   |
| SM.2214              | <i>coronatus</i>         | <i>coronatus</i> | <i>coronatus</i> | Beauvoir            | France   | X | X | X | X | X |
| SM.2215              | <i>coronatus</i>         | <i>coronatus</i> | -                | Beauvoir            | France   |   | X | X | X |   |
| SM.2216              | <i>coronatus</i>         | <i>coronatus</i> | <i>coronatus</i> | Beauvoir            | France   | X | X | X | X | X |
| SM.2217              | <i>coronatus</i>         | <i>coronatus</i> | <i>coronatus</i> | Mas d'Artige        | France   | X | X | X |   |   |
| SM.2218              | <i>coronatus</i>         | <i>coronatus</i> | <i>coronatus</i> | Mas d'Artige        | France   | X | X | X | X |   |
| SM.2219              | <i>coronatus</i>         | <i>coronatus</i> | <i>coronatus</i> | Mas d'Artige        | France   | X | X | X |   | X |
| SM.2222              | <i>granarius</i>         | <i>granarius</i> | <i>granarius</i> | Samarra             | Portugal | X | X |   |   | X |
| SM.2224              | <i>granarius</i>         | <i>granarius</i> | <i>granarius</i> | Serra da Estrela    | Portugal | X | X |   |   | X |
| SM.2225              | <i>granarius</i>         | <i>granarius</i> | <i>granarius</i> | Sintra              | Portugal | X | X | X |   | X |
| SM.2228              | <i>coronatus</i>         | <i>coronatus</i> | -                | Calais              | France   |   |   |   | X | X |
| SM.2229              | <i>coronatus</i>         | <i>coronatus</i> | -                | Calais              | France   |   |   |   |   | X |
| SM.2230              | <i>coronatus</i>         | <i>coronatus</i> | -                | Mt St Michel        | France   |   | X |   |   | X |
| SM.2231              | <i>coronatus</i>         | <i>coronatus</i> | <i>coronatus</i> | Mt St Michel        | France   | X | X |   |   | X |
| SM.2232              | <i>coronatus</i>         | <i>coronatus</i> | -                | Calais              | France   |   | X |   |   | X |

|         |                  |   |                  |          |          |   |  |  |  |  |
|---------|------------------|---|------------------|----------|----------|---|--|--|--|--|
| SM.2433 | <i>granarius</i> | - | <i>granarius</i> | Vila-Chã | Portugal | X |  |  |  |  |
|---------|------------------|---|------------------|----------|----------|---|--|--|--|--|

<sup>1</sup>Granollers Museum code: 96116112

<sup>2</sup>Granollers Museum code: 96041911

<sup>3</sup>Granollers Museum code: 98063001

<sup>4</sup>Granollers Museum code: 96091009

<sup>5</sup>Granollers Museum code: P1/AND1
